# Supplementary material
Source: PubMed Central journal article supplement (PMC3372160)
Supplement: supp_50.6.1905_JCM-JCM06843-11-s01.pdf [file supp_50.6.1905_JCM-JCM06843-11-s01.pdf]

Supplementary Table 1. List of non-typhi *Salmonella*, *Escherichia* and *Shigella* genomes used in the study.

| Strain                                       | Sequencing status | GenBank accession no.                                                   |
|----------------------------------------------|-------------------|-------------------------------------------------------------------------|
| <i>Escherichia</i> 1 1 43                    | draft             | ACID00000000 <sup>2</sup>                                               |
| <i>Escherichia</i> 3 2<br>53FAA              | draft             | ACAC00000000 <sup>2</sup>                                               |
| <i>Escherichia</i> 4 1 40B                   | draft             | ACDM00000000 <sup>2</sup>                                               |
| <i>Escherichia albertii</i><br>TW07627       | draft             | ABKX00000000 <sup>2</sup>                                               |
| <i>E. albertii</i> TW08933                   | draft             | AEJU00000000 <sup>3</sup>                                               |
| <i>E. albertii</i> TW11588                   | draft             | AEMF00000000 <sup>3</sup>                                               |
| <i>E. albertii</i> TW15818                   | draft             | AEJY00000000 <sup>3</sup>                                               |
| <i>Escherichia coli</i><br>O157:H7 str. 1125 | draft             | AERR00000000 <sup>3</sup>                                               |
| <i>E. coli</i> O104:H4 str.<br>H112180541    | draft             | AFRO00000000 <sup>3</sup>                                               |
| <i>E. coli</i> O104:H4 str.<br>C227-11       | draft             | AFRH00000000 <sup>3</sup>                                               |
| <i>E. coli</i> O104:H4 str.<br>C236-11       | draft             | AFRI00000000 <sup>3</sup>                                               |
| <i>E. coli</i> O104:H4 str.<br>04-8351       | draft             | AFRL00000000 <sup>3</sup>                                               |
| <i>E. coli</i> O104:H4 str.<br>09-7901       | draft             | AFRK00000000 <sup>3</sup>                                               |
| <i>E. coli</i> O104:H4 str.<br>11-3677       | draft             | AFRM00000000 <sup>3</sup>                                               |
| <i>E. coli</i> BL21 Gold<br>DE3 pLysS AG     | complete          | CP001665 <sup>1</sup>                                                   |
| <i>E. coli</i> clone D i14                   | complete          | CP002212 <sup>1</sup>                                                   |
| <i>E. coli</i> clone D i2                    | complete          | CP002211 <sup>1</sup>                                                   |
| <i>E. coli</i> O127 H6 E2348<br>69           | complete          | FM180570 <sup>1</sup><br>FM180569 <sup>1</sup><br>FM180568 <sup>1</sup> |
| <i>E. coli</i> 042                           | complete          | FN554766 <sup>1</sup><br>FN554767 <sup>1</sup>                          |
| <i>E. coli</i> 1 2264                        | draft             | AEZO00000000 <sup>2</sup>                                               |
| <i>E. coli</i> 1 2741                        | draft             | AEZI00000000 <sup>2</sup>                                               |

---

|                           |          |                                                |
|---------------------------|----------|------------------------------------------------|
| <i>E. coli</i> 101 1      | draft    | AAMK00000000 <sup>3</sup>                      |
| <i>E. coli</i> 1180       | draft    | ADUQ00000000 <sup>3</sup>                      |
| <i>E. coli</i> 1357       | draft    | ADUR00000000 <sup>3</sup>                      |
| <i>E. coli</i> 1827 70    | draft    | ADUK00000000 <sup>3</sup>                      |
| <i>E. coli</i> 2 3916     | draft    | AFAB00000000 <sup>2</sup>                      |
| <i>E. coli</i> 2 4168     | draft    | AFAD00000000 <sup>2</sup>                      |
| <i>E. coli</i> 2362 75    | draft    | ADUL00000000 <sup>3</sup>                      |
| <i>E. coli</i> 2534 86    | draft    | AFDS00000000 <sup>3</sup>                      |
| <i>E. coli</i> 3 2303     | draft    | AFAE00000000 <sup>2</sup>                      |
| <i>E. coli</i> 3 2608     | draft    | AEZS00000000 <sup>2</sup>                      |
| <i>E. coli</i> 3 3884     | draft    | AFAC00000000 <sup>2</sup>                      |
| <i>E. coli</i> 3003       | draft    | AFAF00000000 <sup>2</sup>                      |
| <i>E. coli</i> 3030 1     | draft    | AFDT00000000 <sup>3</sup>                      |
| <i>E. coli</i> 3431       | draft    | ADUM00000000 <sup>3</sup>                      |
| <i>E. coli</i> 4 0522     | draft    | AEZU00000000 <sup>2</sup>                      |
| <i>E. coli</i> 4 0967     | draft    | AFAA00000000 <sup>2</sup>                      |
| <i>E. coli</i> 5 0588     | draft    | AEZK00000000 <sup>2</sup>                      |
| <i>E. coli</i> 5 0959     | draft    | AEZX00000000 <sup>2</sup>                      |
| <i>E. coli</i> 536        | complete | CP000247 <sup>1</sup>                          |
| <i>E. coli</i> 53638      | draft    | AAKB00000000 <sup>3</sup>                      |
| <i>E. coli</i> 55989      | complete | CU928145 <sup>1</sup>                          |
| <i>E. coli</i> 83972      | draft    | ACGN00000000 <sup>2</sup>                      |
| <i>E. coli</i> 9 0111     | draft    | AEZZ00000000 <sup>2</sup>                      |
| <i>E. coli</i> 9 1649     | draft    | AEZY00000000 <sup>2</sup>                      |
| <i>E. coli</i> 900105 10e | draft    | AFAI00000000 <sup>2</sup>                      |
| <i>E. coli</i> 93 0624    | draft    | AEZT00000000 <sup>2</sup>                      |
| <i>E. coli</i> 95 0941    | draft    | AEZN00000000 <sup>2</sup>                      |
| <i>E. coli</i> 96 0497    | draft    | AEZQ00000000 <sup>2</sup>                      |
| <i>E. coli</i> 96 154     | draft    | AEZW00000000 <sup>2</sup>                      |
| <i>E. coli</i> 97 0246    | draft    | AEZJ00000000 <sup>2</sup>                      |
| <i>E. coli</i> 97 0259    | draft    | AEZL00000000 <sup>2</sup>                      |
| <i>E. coli</i> 97 0264    | draft    | AEZP00000000 <sup>2</sup>                      |
| <i>E. coli</i> 99 0741    | draft    | AEZR00000000 <sup>2</sup>                      |
| <i>E. coli</i> AA86       | draft    | AFET00000000 <sup>3</sup>                      |
| <i>E. coli</i> ABU 83972  | complete | CP001671 <sup>1</sup><br>CP001833 <sup>1</sup> |
| <i>E. coli</i> APEC O1    | complete | CP000468 <sup>1</sup><br>DQ517526 <sup>1</sup> |

---

---

|                            |          |                           |
|----------------------------|----------|---------------------------|
|                            |          | DQ381420 <sup>1</sup>     |
| <i>E. coli</i> B REL606    | complete | CP000819 <sup>1</sup>     |
| <i>E. coli</i> B088        | draft    | ACXE00000000 <sup>2</sup> |
| <i>E. coli</i> B171        | draft    | AAJX00000000 <sup>3</sup> |
| <i>E. coli</i> B185        | draft    | ACXF00000000 <sup>2</sup> |
| <i>E. coli</i> B354        | draft    | ACXG00000000 <sup>2</sup> |
| <i>E. coli</i> B41         | draft    | AFAH00000000 <sup>2</sup> |
| <i>E. coli</i> B7A         | draft    | AAJT00000000 <sup>3</sup> |
| <i>E. coli</i> BL21 DE3    | complete | CP001509 <sup>1</sup>     |
| <i>E. coli</i> BL21 DE3    | complete | AM946981 <sup>1</sup>     |
| <i>E. coli</i> BW2952      | complete | CP001396 <sup>1</sup>     |
| <i>E. coli</i> C ATCC 8739 | complete | CP000946 <sup>1</sup>     |
| <i>E. coli</i> CFT073      | complete | AE014075 <sup>1</sup>     |
| <i>E. coli</i> cloneA i1   | draft    | AEYT00000000 <sup>3</sup> |
| <i>E. coli</i> DH1         | complete | AP012030 <sup>1</sup>     |
| <i>E. coli</i> DH1         | complete | CP001637 <sup>1</sup>     |
| <i>E. coli</i> E110019     | draft    | AAJW00000000 <sup>3</sup> |
| <i>E. coli</i> E1167       | draft    | AEHS00000000 <sup>2</sup> |
| <i>E. coli</i> E128010     | draft    | ADUO00000000 <sup>3</sup> |
| <i>E. coli</i> E1520       | draft    | AEHT00000000 <sup>2</sup> |
| <i>E. coli</i> E22         | draft    | AAJV00000000 <sup>3</sup> |
|                            |          | CP000795 <sup>1</sup>     |
|                            |          | CP000796 <sup>1</sup>     |
|                            |          | CP000797 <sup>1</sup>     |
| <i>E. coli</i> E24377A     | complete | CP000798 <sup>1</sup>     |
|                            |          | CP000799 <sup>1</sup>     |
|                            |          | CP000801 <sup>1</sup>     |
|                            |          | CP000800 <sup>1</sup>     |
| <i>E. coli</i> E482        | draft    | AEHU00000000 <sup>2</sup> |
| <i>E. coli</i> EC4100B     | draft    | AERU00000000 <sup>3</sup> |
| <i>E. coli</i> ED1a        | complete | CU928162 <sup>1</sup>     |
| <i>E. coli</i> EPECa14     | draft    | ADUN00000000 <sup>3</sup> |
|                            |          | FN649414 <sup>1</sup>     |
|                            |          | FN649415 <sup>1</sup>     |
| <i>E. coli</i> ETEC H10407 | complete | FN649416 <sup>1</sup>     |
|                            |          | FN649417 <sup>1</sup>     |
|                            |          | FN649418 <sup>1</sup>     |
| <i>E. coli</i> F11         | draft    | AAJU00000000 <sup>3</sup> |

---

---

|                                          |          |                           |
|------------------------------------------|----------|---------------------------|
| <i>E. coli</i> FVEC1302                  | draft    | ACXH00000000 <sup>2</sup> |
| <i>E. coli</i> FVEC1412                  | draft    | ACXI00000000 <sup>2</sup> |
| <i>E. coli</i> G58 1                     | draft    | AFDX00000000 <sup>3</sup> |
| <i>E. coli</i> H120                      | draft    | AEHV00000000 <sup>2</sup> |
| <i>E. coli</i> H252                      | draft    | AEFI00000000 <sup>2</sup> |
| <i>E. coli</i> H263                      | draft    | AEFJ00000000 <sup>2</sup> |
| <i>E. coli</i> H299                      | draft    | ADBC00000000 <sup>2</sup> |
| <i>E. coli</i> H30                       | draft    | AEZM00000000 <sup>2</sup> |
| <i>E. coli</i> H489                      | draft    | AEHX00000000 <sup>2</sup> |
| <i>E. coli</i> H591                      | draft    | ADBB00000000 <sup>2</sup> |
| <i>E. coli</i> H736                      | draft    | ADAU00000000 <sup>2</sup> |
| <i>E. coli</i> HM605                     | draft    | CADZ00000000 <sup>2</sup> |
| <i>E. coli</i> HS                        | complete | CP000802 <sup>1</sup>     |
| <i>E. coli</i> IAI1                      | complete | CU928160 <sup>1</sup>     |
| <i>E. coli</i> IAI39                     | complete | CU928164 <sup>1</sup>     |
| <i>E. coli</i> IHE3034                   | complete | CP001969 <sup>1</sup>     |
| <i>E. coli</i> JB1 95                    | draft    | AEZV00000000 <sup>2</sup> |
| <i>E. coli</i> K 12 substr<br>DH10B      | complete | CP000948 <sup>1</sup>     |
| <i>E. coli</i> K 12 substr<br>MG1655     | complete | U00096 <sup>1</sup>       |
| <i>E. coli</i> K 12 substr<br>MG1655star | draft    | AEFE00000000 <sup>2</sup> |
| <i>E. coli</i> K 12 substr<br>W3110      | complete | AP009048 <sup>1</sup>     |
|                                          |          | CP002516 <sup>1</sup>     |
| <i>E. coli</i> KO11                      | complete | CP002517 <sup>1</sup>     |
|                                          |          | CP002518 <sup>1</sup>     |
| <i>E. coli</i> LF82                      | complete | CU651637 <sup>1</sup>     |
| <i>E. coli</i> LT 68                     | draft    | ADUP00000000 <sup>3</sup> |
| <i>E. coli</i> M605                      | draft    | ADAV00000000 <sup>2</sup> |
| <i>E. coli</i> M718                      | draft    | ADAW00000000 <sup>2</sup> |
| <i>E. coli</i> M863                      | draft    | AEHZ00000000 <sup>2</sup> |
| <i>E. coli</i> MS 107 1                  | draft    | ADWV00000000 <sup>3</sup> |
| <i>E. coli</i> MS 110 3                  | draft    | ADTW00000000 <sup>2</sup> |
| <i>E. coli</i> MS 115 1                  | draft    | ADTL00000000 <sup>2</sup> |
| <i>E. coli</i> MS 116 1                  | draft    | ADTZ00000000 <sup>2</sup> |
| <i>E. coli</i> MS 117 3                  | draft    | ADTS00000000 <sup>2</sup> |

---

---

|                                          |          |                                                |
|------------------------------------------|----------|------------------------------------------------|
| <i>E. coli</i> MS 119 7                  | draft    | ADWU00000000 <sup>3</sup>                      |
| <i>E. coli</i> MS 124 1                  | draft    | ADWT00000000 <sup>3</sup>                      |
| <i>E. coli</i> MS 145 7                  | draft    | ADWS00000000 <sup>3</sup>                      |
| <i>E. coli</i> MS 146 1                  | draft    | ADTN00000000 <sup>2</sup>                      |
| <i>E. coli</i> MS 153 1                  | draft    | ADTX00000000 <sup>2</sup>                      |
| <i>E. coli</i> MS 16 3                   | draft    | ADUA00000000 <sup>2</sup>                      |
| <i>E. coli</i> MS 175 1                  | draft    | ADUB00000000 <sup>2</sup>                      |
| <i>E. coli</i> MS 182 1                  | draft    | ADTM00000000 <sup>2</sup>                      |
| <i>E. coli</i> MS 185 1                  | draft    | ADUE00000000 <sup>2</sup>                      |
| <i>E. coli</i> MS 187 1                  | draft    | ADTQ00000000 <sup>2</sup>                      |
| <i>E. coli</i> MS 196 1                  | draft    | ADUD00000000 <sup>2</sup>                      |
| <i>E. coli</i> MS 198 1                  | draft    | ADTJ00000000 <sup>2</sup>                      |
| <i>E. coli</i> MS 200 1                  | draft    | ADUC00000000 <sup>2</sup>                      |
| <i>E. coli</i> MS 21 1                   | draft    | ADTR00000000 <sup>2</sup>                      |
| <i>E. coli</i> MS 45 1                   | draft    | ADTO00000000 <sup>2</sup>                      |
| <i>E. coli</i> MS 57 2                   | draft    | ADUG00000000 <sup>2</sup>                      |
| <i>E. coli</i> MS 60 1                   | draft    | ADUF00000000 <sup>2</sup>                      |
| <i>E. coli</i> MS 69 1                   | draft    | ADTP00000000 <sup>2</sup>                      |
| <i>E. coli</i> MS 78 1                   | draft    | ADTY00000000 <sup>2</sup>                      |
| <i>E. coli</i> MS 79 10                  | draft    | ADWR00000000 <sup>3</sup>                      |
| <i>E. coli</i> MS 84 1                   | draft    | ADTK00000000 <sup>2</sup>                      |
| <i>E. coli</i> MS 85 1                   | draft    | ADWQ00000000 <sup>3</sup>                      |
| <i>E. coli</i> NA114                     | complete | CP002797 <sup>1</sup>                          |
| <i>E. coli</i> NC101                     | draft    | AEFA00000000 <sup>3</sup>                      |
| <i>E. coli</i> O103 H2<br>12009          | complete | AP010958 <sup>1</sup><br>AP010959 <sup>1</sup> |
| <i>E. coli</i> O103 H25<br>NIPH 11060424 | draft    | AGSG00000000 <sup>3</sup>                      |
| <i>E. coli</i> O104 H4                   | draft    | AFOB00000000 <sup>3</sup>                      |
| <i>E. coli</i> O104 H4 01<br>09591       | draft    | AFPS00000000 <sup>3</sup>                      |
| <i>E. coli</i> O104 H4 11<br>4404        | draft    | AFUX00000000 <sup>3</sup>                      |
| <i>E. coli</i> O104 H4 11<br>4522        | draft    | AFUY00000000 <sup>3</sup>                      |
| <i>E. coli</i> O104 H4 11<br>4623        | draft    | AFUZ00000000 <sup>3</sup>                      |
| <i>E. coli</i> O104 H4 11                | draft    | AFVA00000000 <sup>3</sup>                      |

---

---

|                              |          |  |                           |
|------------------------------|----------|--|---------------------------|
| 4632 C1                      |          |  |                           |
| <i>E. coli</i> O104 H4 11    | draft    |  | AFVB00000000 <sup>3</sup> |
| 4632 C2                      |          |  |                           |
| <i>E. coli</i> O104 H4 11    | draft    |  | AFVC00000000 <sup>3</sup> |
| 4632 C3                      |          |  |                           |
| <i>E. coli</i> O104 H4 11    | draft    |  | AFVD00000000 <sup>3</sup> |
| 4632 C4                      |          |  |                           |
| <i>E. coli</i> O104 H4 11    | draft    |  | AFVE00000000 <sup>3</sup> |
| 4632 C5                      |          |  |                           |
| <i>E. coli</i> O104 H4 C227  | draft    |  | AFST00000000 <sup>3</sup> |
| 11                           |          |  |                           |
| <i>E. coli</i> O104 H4 Ec11  | draft    |  | AFVG00000000 <sup>3</sup> |
| 5537                         |          |  |                           |
| <i>E. coli</i> O104 H4 Ec11  | draft    |  | AFVH00000000 <sup>3</sup> |
| 5537                         |          |  |                           |
| <i>E. coli</i> O104 H4 Ec11  | draft    |  | AFVF00000000 <sup>3</sup> |
| 5538                         |          |  |                           |
| <i>E. coli</i> O104 H4       | draft    |  | AFWO00000000 <sup>3</sup> |
| GOS1                         |          |  |                           |
| <i>E. coli</i> O104 H4       | draft    |  | AFWP00000000 <sup>3</sup> |
| GOS2                         |          |  |                           |
| <i>E. coli</i> O104 H4       | draft    |  | AFPN00000000 <sup>2</sup> |
| H112180280                   |          |  |                           |
| <i>E. coli</i> O104 H4       | draft    |  | AFSO00000000 <sup>3</sup> |
| H112180282                   |          |  |                           |
| <i>E. coli</i> O104 H4       | draft    |  | AFWC00000000 <sup>3</sup> |
| H112180283                   |          |  |                           |
| <i>E. coli</i> O104 H4       | draft    |  | AFWB00000000 <sup>3</sup> |
| H112180540                   |          |  |                           |
|                              |          |  | AP010960 <sup>1</sup>     |
|                              |          |  | AP010961 <sup>1</sup>     |
| <i>E. coli</i> O111 H 11128  | complete |  | AP010962 <sup>1</sup>     |
|                              |          |  | AP010963 <sup>1</sup>     |
|                              |          |  | AP010964 <sup>1</sup>     |
|                              |          |  | AP010965 <sup>1</sup>     |
| <i>E. coli</i> O113 H21 CL 3 | draft    |  | AGTH00000000 <sup>3</sup> |
| <i>E. coli</i> O121 H19 MT   | draft    |  | AGTJ00000000 <sup>3</sup> |
| 2                            |          |  |                           |

---

---

|                                    |          |                                                                         |
|------------------------------------|----------|-------------------------------------------------------------------------|
| <i>E. coli</i> O145 H28<br>4865 96 | draft    | AGTL00000000 <sup>3</sup>                                               |
| <i>E. coli</i> O157 H 493 89       | draft    | AETY00000000 <sup>3</sup>                                               |
| <i>E. coli</i> O157 H 493 89       | draft    | AGTG00000000 <sup>3</sup>                                               |
| <i>E. coli</i> O157 H H 2687       | draft    | AETZ00000000 <sup>3</sup>                                               |
| <i>E. coli</i> O157 H7 1044        | draft    | AERP00000000 <sup>3</sup>                                               |
| <i>E. coli</i> O157 H7<br>EC1212   | draft    | AERQ00000000 <sup>3</sup>                                               |
| <i>E. coli</i> O157 H7<br>EC4009   | draft    | ADMX00000000 <sup>3</sup>                                               |
| <i>E. coli</i> O157 H7<br>EC4024   | draft    | ABJT00000000 <sup>2</sup>                                               |
| <i>E. coli</i> O157 H7<br>EC4042   | draft    | ABHM00000000 <sup>3</sup>                                               |
| <i>E. coli</i> O157 H7<br>EC4045   | draft    | ABHL00000000 <sup>3</sup>                                               |
| <i>E. coli</i> O157 H7<br>EC4076   | draft    | ABHQ00000000 <sup>3</sup>                                               |
| <i>E. coli</i> O157 H7<br>EC4084   | draft    | ADUY00000000 <sup>3</sup>                                               |
| <i>E. coli</i> O157 H7<br>EC4113   | draft    | ABHP00000000 <sup>3</sup>                                               |
| <i>E. coli</i> O157 H7<br>EC4115   | complete | CP001163 <sup>1</sup><br>CP001164 <sup>1</sup><br>CP001165 <sup>1</sup> |
| <i>E. coli</i> O157 H7<br>EC4127   | draft    | ADUZ00000000 <sup>3</sup>                                               |
| <i>E. coli</i> O157 H7<br>EC4191   | draft    | ADVA00000000 <sup>3</sup>                                               |
| <i>E. coli</i> O157 H7<br>EC4192   | draft    | ADUX00000000 <sup>3</sup>                                               |
| <i>E. coli</i> O157 H7<br>EC4196   | draft    | ABHO00000000 <sup>3</sup>                                               |
| <i>E. coli</i> O157 H7<br>EC4205   | draft    | ADVB00000000 <sup>3</sup>                                               |
| <i>E. coli</i> O157 H7<br>EC4206   | draft    | ABHK00000000 <sup>3</sup>                                               |
| <i>E. coli</i> O157 H7             | draft    | ABHR00000000 <sup>3</sup>                                               |

---

---

|                              |          |  |                           |
|------------------------------|----------|--|---------------------------|
| EC4401                       |          |  |                           |
| <i>E. coli</i> O157 H7       | draft    |  | ABHS00000000 <sup>3</sup> |
| EC4486                       |          |  |                           |
| <i>E. coli</i> O157 H7       | draft    |  | ABHT00000000 <sup>3</sup> |
| EC4501                       |          |  |                           |
| <i>E. coli</i> O157 H7       | draft    |  | ABHW00000000 <sup>3</sup> |
| EC508                        |          |  |                           |
| <i>E. coli</i> O157 H7       | draft    |  | ADVC00000000 <sup>3</sup> |
| EC536                        |          |  |                           |
| <i>E. coli</i> O157 H7       | draft    |  | ABHU00000000 <sup>3</sup> |
| EC869                        |          |  |                           |
| <i>E. coli</i> O157 H7       | draft    |  | ACXO00000000 <sup>3</sup> |
| FRIK2000                     |          |  |                           |
| <i>E. coli</i> O157 H7       | draft    |  | ACXN00000000 <sup>3</sup> |
| FRIK966                      |          |  |                           |
| <i>E. coli</i> O157 H7       | draft    |  | AETX00000000 <sup>3</sup> |
| G5101                        |          |  |                           |
| <i>E. coli</i> O157 H7 LSU   | draft    |  | AEUC00000000 <sup>3</sup> |
| 61                           |          |  |                           |
| <i>E. coli</i> O157 H7       | complete |  | CP001369 <sup>1</sup>     |
| TW14359                      |          |  | CP001368 <sup>1</sup>     |
| <i>E. coli</i> O157 H7       | draft    |  | ABKY00000000 <sup>2</sup> |
| TW14588                      |          |  |                           |
|                              |          |  | BA000007 <sup>1</sup>     |
| <i>E. coli</i> O157H7        | complete |  | AB011548 <sup>1</sup>     |
|                              |          |  | AB011549 <sup>1</sup>     |
| <i>E. coli</i> O157H7        | complete |  | AE005174 <sup>1</sup>     |
| EDL933                       |          |  | AF074613 <sup>1</sup>     |
| <i>E. coli</i> O25b H4       | draft    |  | CAFL00000000 <sup>3</sup> |
| ST131 EC958                  |          |  |                           |
|                              |          |  | AP010953 <sup>1</sup>     |
|                              |          |  | AP010954 <sup>1</sup>     |
| <i>E. coli</i> O26 H11 11368 | complete |  | AP010955 <sup>1</sup>     |
|                              |          |  | AP010956 <sup>1</sup>     |
|                              |          |  | AP010957 <sup>1</sup>     |
| <i>E. coli</i> O45 H2 03 EN  | draft    |  | AGTK00000000 <sup>3</sup> |
| 705                          |          |  |                           |
| <i>E. coli</i> O55 H7 3256   | draft    |  | AEUA00000000 <sup>3</sup> |

---



---

97 TW 07815

|                                    |          |                                                                                                  |
|------------------------------------|----------|--------------------------------------------------------------------------------------------------|
| <i>E. coli</i> O55 H7<br>CB9615    | complete | CP001846 <sup>1</sup><br>CP001847 <sup>1</sup>                                                   |
| <i>E. coli</i> O55 H7 USDA<br>5905 | draft    | AEUB00000000 <sup>3</sup><br><br>CP003034 <sup>1</sup><br>CP003035 <sup>1</sup>                  |
| <i>E. coli</i> O7 K1 CE10          | complete | CP003036 <sup>1</sup><br>CP003037 <sup>1</sup><br>CP003038 <sup>1</sup>                          |
| <i>E. coli</i> O83 H1 NRG<br>857C  | complete | CP001855 <sup>1</sup><br>CP001856 <sup>1</sup>                                                   |
| <i>E. coli</i> O91 H21 B2F1        | draft    | AGTI00000000 <sup>3</sup>                                                                        |
| <i>E. coli</i> OP50                | draft    | ADBT00000000 <sup>3</sup>                                                                        |
| <i>E. coli</i> PCN033              | draft    | AFAT00000000 <sup>3</sup>                                                                        |
| <i>E. coli</i> RN587 1             | draft    | ADUS00000000 <sup>3</sup>                                                                        |
| <i>E. coli</i> S88                 | complete | CU928161 <sup>1</sup><br>AP009240 <sup>1</sup><br>AP009241 <sup>1</sup><br>AP009242 <sup>1</sup> |
| <i>E. coli</i> SE11                | complete | AP009243 <sup>1</sup><br>AP009244 <sup>1</sup><br>AP009245 <sup>1</sup><br>AP009246 <sup>1</sup> |
| <i>E. coli</i> SE15                | complete | AP009378 <sup>1</sup><br>AP009379 <sup>1</sup><br>CP000970 <sup>1</sup><br>CP000971 <sup>1</sup> |
| <i>E. coli</i> SMS 3 5             | complete | CP000972 <sup>1</sup><br>CP000973 <sup>1</sup><br>CP000974 <sup>1</sup>                          |
| <i>E. coli</i> STEC 7v             | draft    | AEXD00000000 <sup>3</sup>                                                                        |
| <i>E. coli</i> STEC 94C            | draft    | AFDU00000000 <sup>3</sup>                                                                        |
| <i>E. coli</i> STEC B2F1           | draft    | AFDQ00000000 <sup>3</sup>                                                                        |
| <i>E. coli</i> STEC C165 02        | draft    | AFDR00000000 <sup>3</sup>                                                                        |
| <i>E. coli</i> STEC DG131 3        | draft    | AFDV00000000 <sup>3</sup>                                                                        |
| <i>E. coli</i> STEC EH250          | draft    | AFDW00000000 <sup>3</sup>                                                                        |
| <i>E. coli</i> STEC H 1 8          | draft    | AFDY00000000 <sup>3</sup>                                                                        |

---

---

|                            |          |                           |
|----------------------------|----------|---------------------------|
| <i>E. coli</i> STEC MHI813 | draft    | AFDZ00000000 <sup>3</sup> |
| <i>E. coli</i> STEC S1191  | draft    | AFEA00000000 <sup>3</sup> |
| <i>E. coli</i> TA007       | draft    | AEHY00000000 <sup>2</sup> |
| <i>E. coli</i> TA143       | draft    | ADAY00000000 <sup>2</sup> |
| <i>E. coli</i> TA206       | draft    | ADAX00000000 <sup>2</sup> |
| <i>E. coli</i> TA271       | draft    | ADAZ00000000 <sup>2</sup> |
| <i>E. coli</i> TA280       | draft    | ADBA00000000 <sup>2</sup> |
| <i>E. coli</i> TW07793     | draft    | AFAG00000000 <sup>2</sup> |
| <i>E. coli</i> TW10509     | draft    | AEHW00000000 <sup>2</sup> |
| <i>E. coli</i> TW10598     | draft    | AELA00000000 <sup>3</sup> |
| <i>E. coli</i> TW10722     | draft    | AELB00000000 <sup>3</sup> |
| <i>E. coli</i> TW10828     | draft    | AELC00000000 <sup>3</sup> |
| <i>E. coli</i> TW11681     | draft    | AELD00000000 <sup>3</sup> |
| <i>E. coli</i> TW14425     | draft    | AELE00000000 <sup>3</sup> |
| <i>E. coli</i> TX1999      | draft    | AFEB00000000 <sup>3</sup> |
| <i>E. coli</i> TY 2482     | draft    | AFVR00000000 <sup>2</sup> |
| <i>E. coli</i> UM146       | complete | CP002167 <sup>1</sup>     |
|                            |          | CP002168 <sup>1</sup>     |
| <i>E. coli</i> UMN026      | complete | CU928163 <sup>1</sup>     |
|                            |          | CP002890 <sup>1</sup>     |
|                            |          | CP002891 <sup>1</sup>     |
| <i>E. coli</i> UMN18       | complete | CP002892 <sup>1</sup>     |
|                            |          | CP002893 <sup>1</sup>     |
|                            |          | CP002894 <sup>1</sup>     |
|                            |          | CP002895 <sup>1</sup>     |
|                            |          | CP002729 <sup>1</sup>     |
|                            |          | CP002730 <sup>1</sup>     |
| <i>E. coli</i> UMNK88      | complete | CP002731 <sup>1</sup>     |
|                            |          | CP002732 <sup>1</sup>     |
|                            |          | CP002733 <sup>1</sup>     |
|                            |          | HQ023862 <sup>1</sup>     |
| <i>E. coli</i> UTI89       | complete | CP000243 <sup>1</sup>     |
|                            |          | CP000244 <sup>1</sup>     |
| <i>E. coli</i> W           | draft    | AEDF00000000 <sup>3</sup> |
|                            |          | CP002185 <sup>1</sup>     |
| <i>E. coli</i> W           | complete | CP002186 <sup>1</sup>     |
|                            |          | CP002187 <sup>1</sup>     |
| <i>E. coli</i> WV 060327   | draft    | AERT00000000 <sup>3</sup> |

---

---

|                                                                                      |          |                                                                         |
|--------------------------------------------------------------------------------------|----------|-------------------------------------------------------------------------|
| <i>E. coli</i> XH001                                                                 | draft    | AFYG00000000 <sup>3</sup>                                               |
| <i>E. coli</i> XH140A                                                                | draft    | AFVX00000000 <sup>3</sup>                                               |
| <i>Escherichia fergusonii</i><br>ATCC 35469                                          | complete | CU928158 <sup>1</sup><br>CU928144 <sup>1</sup>                          |
| <i>E. fergusonii</i> B253                                                            | draft    | AEIA00000000 <sup>2</sup>                                               |
| <i>E. fergusonii</i> ECD227                                                          | draft    | AEVY00000000 <sup>2</sup>                                               |
| <i>Escherichia</i> TW09231                                                           | draft    | AEJW00000000 <sup>3</sup>                                               |
| <i>Escherichia</i> TW09276                                                           | draft    | AEJV00000000 <sup>3</sup>                                               |
| <i>Escherichia</i> TW09308                                                           | draft    | AEME00000000 <sup>3</sup>                                               |
| <i>Escherichia</i> TW10509                                                           | draft    | AEKA00000000 <sup>3</sup>                                               |
| <i>Escherichia</i> TW14182                                                           | draft    | AEJZ00000000 <sup>3</sup>                                               |
| <i>Escherichia</i> TW15838                                                           | draft    | AEJX00000000 <sup>3</sup>                                               |
| <i>Salmonella bongori</i><br>NCTC 12419                                              | complete | FR877557 <sup>1</sup>                                                   |
| <i>Salmonella enterica</i><br>subsp. <i>arizonae</i><br>serovar 62 z4 z23<br>RSK2980 | complete | CP000880 <sup>1</sup>                                                   |
| <i>Salmonella enterica</i><br>subsp. <i>enterica</i> serovar<br>Choleraesuis         | complete | AY509003 <sup>1</sup><br>AY509004 <sup>1</sup><br>AE017220 <sup>1</sup> |
| <i>S. Paratyphi</i> ATCC<br>9150                                                     | complete | CP000026 <sup>1</sup>                                                   |
| <i>S.</i> 4 5 12 i CVM23701                                                          | draft    | ABAO00000000 <sup>3</sup>                                               |
| <i>S.</i> Adelaide A4 669                                                            | draft    | AFCI00000000 <sup>3</sup>                                               |
| <i>S.</i> Agona SL483                                                                | complete | CP001137 <sup>1</sup><br>CP001138 <sup>1</sup>                          |
| <i>S.</i> Alachua R6 377                                                             | draft    | AFCJ00000000 <sup>3</sup>                                               |
| <i>S.</i> Choleraesuis A50                                                           | draft    | AEJH00000000 <sup>2</sup>                                               |
| <i>S.</i> Dublin 3246                                                                | draft    | AEUK00000000 <sup>2</sup>                                               |
| <i>S.</i> Dublin CT<br>02021853                                                      | complete | CP001143 <sup>1</sup><br>CP001144 <sup>1</sup>                          |
| <i>S.</i> Enteritidis P125109                                                        | complete | AM933172 <sup>1</sup>                                                   |
| <i>S.</i> Gallinarum 287 91                                                          | complete | AM933173 <sup>1</sup>                                                   |
| <i>S.</i> Gallinarum 9                                                               | draft    | AEUL00000000 <sup>2</sup>                                               |
| <i>S.</i> Gaminara A4 567                                                            | draft    | AFCL00000000 <sup>3</sup>                                               |
| <i>S.</i> Give S5 487                                                                | draft    | AFCM00000000 <sup>3</sup>                                               |
| <i>S.</i> Hadar RI 05P066                                                            | draft    | ABFG00000000 <sup>3</sup>                                               |

---

---

|                             |          |                           |
|-----------------------------|----------|---------------------------|
|                             |          | CP001118 <sup>1</sup>     |
| S. Heidelberg SL476         | complete | CP001119 <sup>1</sup>     |
|                             |          | CP001120 <sup>1</sup>     |
| S. Heidelberg SL486         | draft    | ABEL00000000 <sup>3</sup> |
| S. Hvittingfoss A4 620      | draft    | AFCN00000000 <sup>3</sup> |
| S. Infantis SARB27          | draft    | AFYI00000000 <sup>2</sup> |
| S. Inverness R8 3668        | draft    | AFCO00000000 <sup>3</sup> |
| S. Javiana GA<br>MM04042433 | draft    | ABEH00000000 <sup>3</sup> |
| S. Johannesburg S5<br>703   | draft    | AFCP00000000 <sup>3</sup> |
| S. Kentucky CDC 191         | draft    | ABEI00000000 <sup>3</sup> |
| S. Kentucky<br>CVM29188     | draft    | ABAK00000000 <sup>3</sup> |
| S. Minnesota A4 603         | draft    | AFCQ00000000 <sup>3</sup> |
| S. Mississippi A4 633       | draft    | AFCR00000000 <sup>3</sup> |
| S. Montevideo 19N           | draft    | AESV00000000 <sup>3</sup> |
| S. Montevideo<br>2009083312 | draft    | AETO00000000 <sup>3</sup> |
| S. Montevideo<br>2009085258 | draft    | AETP00000000 <sup>3</sup> |
| S. Montevideo<br>315731156  | draft    | AETQ00000000 <sup>3</sup> |
| S. Montevideo<br>315996572  | draft    | AESH00000000 <sup>3</sup> |
| S. Montevideo 366867        | draft    | AETC00000000 <sup>3</sup> |
| S. Montevideo 413180        | draft    | AETD00000000 <sup>3</sup> |
| S. Montevideo 414877        | draft    | AETB00000000 <sup>3</sup> |
| S. Montevideo 446600        | draft    | AETE00000000 <sup>3</sup> |
| S. Montevideo 495297<br>1   | draft    | AESI00000000 <sup>3</sup> |
| S. Montevideo 495297<br>3   | draft    | AESJ00000000 <sup>3</sup> |
| S. Montevideo 495297<br>4   | draft    | AESK00000000 <sup>3</sup> |
| S. Montevideo 507440<br>20  | draft    | AETI00000000 <sup>3</sup> |
| S. Montevideo 515920        | draft    | AESL00000000 <sup>3</sup> |

---

---

|                                   |       |                           |
|-----------------------------------|-------|---------------------------|
| 1                                 |       |                           |
| S. Montevideo 515920              | draft | AESM00000000 <sup>3</sup> |
| 2                                 |       |                           |
| S. Montevideo 531954              | draft | AESN00000000 <sup>3</sup> |
| S. Montevideo 556150              | draft | AETG00000000 <sup>3</sup> |
| 1                                 |       |                           |
| S. Montevideo 556152              | draft | AETJ00000000 <sup>3</sup> |
| S. Montevideo 609458              | draft | AETF00000000 <sup>3</sup> |
| 1                                 |       |                           |
| S. Montevideo 609460              | draft | AETH00000000 <sup>3</sup> |
| S. Montevideo 81038               | draft | AESZ00000000 <sup>3</sup> |
| 01                                |       |                           |
| S. Montevideo CASC<br>09SCPH15965 | draft | AESQ00000000 <sup>3</sup> |
| S. Montevideo IA<br>2009159199    | draft | AETR00000000 <sup>3</sup> |
| S. Montevideo IA<br>2010008282    | draft | AETS00000000 <sup>3</sup> |
| S. Montevideo IA<br>2010008283    | draft | AETT00000000 <sup>3</sup> |
| S. Montevideo IA<br>2010008284    | draft | AETU00000000 <sup>3</sup> |
| S. Montevideo IA<br>2010008285    | draft | AETV00000000 <sup>3</sup> |
| S. Montevideo IA<br>2010008287    | draft | AETW00000000 <sup>3</sup> |
| S. Montevideo<br>MB101509 0077    | draft | AETK00000000 <sup>3</sup> |
| S. Montevideo<br>MB102109 0047    | draft | AETL00000000 <sup>3</sup> |
| S. Montevideo<br>MB110209 0055    | draft | AETM00000000 <sup>3</sup> |
| S. Montevideo<br>MB111609 0052    | draft | AETN00000000 <sup>3</sup> |
| S. Montevideo MD<br>MDA09249507   | draft | AETA00000000 <sup>3</sup> |
| S. Montevideo NC<br>MB110209 0054 | draft | AESO00000000 <sup>3</sup> |

---

---

|                                       |          |                                                                         |
|---------------------------------------|----------|-------------------------------------------------------------------------|
| <i>S. Montevideo</i> OH<br>2009072675 | draft    | AESP00000000 <sup>3</sup>                                               |
| <i>S. Montevideo</i> S5 403           | draft    | AFCS00000000 <sup>3</sup><br>CP000604 <sup>1</sup>                      |
| <i>S. Newport</i> SL254               | complete | CP001112 <sup>1</sup><br>CP001113 <sup>1</sup>                          |
| <i>S. Newport</i> SL317               | draft    | ABEW00000000 <sup>3</sup>                                               |
| <i>S. Paratyphi</i> A AKU<br>12601    | complete | FM200053 <sup>1</sup>                                                   |
| <i>S. Paratyphi</i> B SPB7            | complete | CP000886 <sup>1</sup>                                                   |
| <i>S. Paratyphi</i> C<br>RKS4594      | complete | CP000857 <sup>1</sup><br>CP000858 <sup>1</sup>                          |
| <i>S. Rubislaw</i> A4 653             | draft    | AFCT00000000 <sup>3</sup>                                               |
| <i>S. Saintpaul</i> SARA23            | draft    | ABAM00000000 <sup>3</sup>                                               |
| <i>S. Saintpaul</i> SARA29            | draft    | ABAN00000000 <sup>3</sup>                                               |
| <i>S. Schwarzengrund</i><br>CVM19633  | complete | CP001125 <sup>1</sup><br>CP001126 <sup>1</sup><br>CP001127 <sup>1</sup> |
| <i>S. Schwarzengrund</i><br>SL480     | draft    | ABEJ00000000 <sup>3</sup>                                               |
| <i>S. Senftenberg</i> A4 543          | draft    | AFCU00000000 <sup>3</sup>                                               |
| <i>S. Tennessee</i> CDC07<br>0191     | draft    | ACBF00000000 <sup>3</sup>                                               |
| <i>S. Typhimurium</i>                 | complete | FN424405 <sup>1</sup>                                                   |
| <i>S. Typhimurium</i><br>14028S       | complete | CP001362 <sup>1</sup><br>CP001363 <sup>1</sup><br>CP002487 <sup>1</sup> |
| <i>S. Typhimurium</i> 4 74            | complete | CP002488 <sup>1</sup><br>CP002489 <sup>1</sup><br>CP002490 <sup>1</sup> |
| <i>S. Typhimurium</i><br>SL1344       | complete | FQ312003 <sup>1</sup>                                                   |
| <i>S. Typhimurium</i><br>T000240      | complete | AP011957 <sup>1</sup><br>AP011958 <sup>1</sup><br>AP011959 <sup>1</sup> |
| <i>S. Typhimurium</i><br>TN061786     | draft    | AERV00000000 <sup>3</sup>                                               |

---

---

|                                      |          |                                                                                                                                                    |
|--------------------------------------|----------|----------------------------------------------------------------------------------------------------------------------------------------------------|
| <i>S. Typhimurium</i> UK 1           | complete | CP002614 <sup>1</sup><br>CP002615 <sup>1</sup>                                                                                                     |
| <i>S. Uganda</i> R8 3404             | draft    | AFCV00000000 <sup>3</sup>                                                                                                                          |
| <i>S. Urbana</i> R8 2977             | draft    | AFCW00000000 <sup>3</sup>                                                                                                                          |
| <i>S. Virchow</i> SL491              | draft    | ABFH00000000 <sup>3</sup>                                                                                                                          |
| <i>S. Wandsworth</i> A4 580          | draft    | AFCX00000000 <sup>3</sup>                                                                                                                          |
| <i>S. Weltevreden</i> HI N05<br>537  | draft    | ABFF00000000 <sup>3</sup>                                                                                                                          |
| <i>S. Typhimurium</i> LT2            | complete | AE006468 <sup>1</sup><br>AE006471 <sup>1</sup>                                                                                                     |
| <i>Shigella boydii</i> 3594<br>74    | draft    | AFGC00000000 <sup>3</sup>                                                                                                                          |
| <i>S. boydii</i> 5216 82             | draft    | AFGE00000000 <sup>3</sup>                                                                                                                          |
| <i>S. boydii</i> ATCC 9905           | draft    | AERN00000000 <sup>3</sup>                                                                                                                          |
| <i>S. boydii</i> CDC 3083<br>94      | complete | CP001058 <sup>1</sup><br>CP001059 <sup>1</sup><br>CP001060 <sup>1</sup><br>CP001062 <sup>1</sup><br>CP001063 <sup>1</sup><br>CP001061 <sup>1</sup> |
| <i>S. boydii</i> Sb227               | complete | CP000036 <sup>1</sup><br>CP000037 <sup>1</sup>                                                                                                     |
| <i>Shigella</i> D9                   | draft    | ACDL00000000 <sup>2</sup><br>CP000034 <sup>1</sup>                                                                                                 |
| <i>Shigella dysenteriae</i>          | complete | CP000035 <sup>1</sup><br>CP000640 <sup>1</sup>                                                                                                     |
| <i>S. dysenteriae</i> 1012           | draft    | AAMJ00000000 <sup>3</sup>                                                                                                                          |
| <i>S. dysenteriae</i> 155 74         | draft    | AFFZ00000000 <sup>3</sup>                                                                                                                          |
| <i>S. dysenteriae</i> 1617           | draft    | ADUT00000000 <sup>3</sup>                                                                                                                          |
| <i>S. dysenteriae</i> CDC 74<br>1112 | draft    | AERM00000000 <sup>3</sup>                                                                                                                          |
| <i>Shigella flexneri</i><br>2002017  | complete | CP001383 <sup>1</sup><br>CP001384 <sup>1</sup><br>CP001385 <sup>1</sup><br>CP001386 <sup>1</sup><br>CP001387 <sup>1</sup><br>CP001388 <sup>1</sup> |
| <i>S. flexneri</i> 2747 71           | draft    | AFHB00000000 <sup>3</sup>                                                                                                                          |

---

---

|                                  |          |                           |
|----------------------------------|----------|---------------------------|
| <i>S. flexneri</i> 2930 71       | draft    | AFHD00000000 <sup>3</sup> |
| <i>S. flexneri</i> 2a 2457T      | draft    | ADUV00000000 <sup>3</sup> |
| <i>S. flexneri</i> 2a 2457T      | complete | AE014073 <sup>1</sup>     |
| <i>S. flexneri</i> 2a 301        | complete | AE005674 <sup>1</sup>     |
|                                  |          | AF386526 <sup>1</sup>     |
| <i>S. flexneri</i> 4343 70       | draft    | AFHC00000000 <sup>3</sup> |
| <i>S. flexneri</i> 5 8401        | complete | CP000266 <sup>1</sup>     |
| <i>S. flexneri</i> CDC 796<br>83 | draft    | AERO00000000 <sup>3</sup> |
| <i>S. flexneri</i> J1713         | draft    | AFOW00000000 <sup>3</sup> |
| <i>S. flexneri</i> K 218         | draft    | AFGV00000000 <sup>3</sup> |
| <i>S. flexneri</i> K 227         | draft    | AFGY00000000 <sup>3</sup> |
| <i>S. flexneri</i> K 272         | draft    | AFGX00000000 <sup>3</sup> |
| <i>S. flexneri</i> K 304         | draft    | AFGZ00000000 <sup>3</sup> |
| <i>S. flexneri</i> K 671         | draft    | AFHA00000000 <sup>3</sup> |
| <i>S. flexneri</i> VA 6          | draft    | AFGW00000000 <sup>3</sup> |
| <i>Shigella sonnei</i> 53G       | draft    | ADUU00000000 <sup>3</sup> |
|                                  |          | CP000038 <sup>1</sup>     |
|                                  |          | CP000039 <sup>1</sup>     |
|                                  |          | CP000641 <sup>1</sup>     |
| <i>S. sonnei</i> Ss046           | complete | CP000642 <sup>1</sup>     |
|                                  |          | CP000643 <sup>1</sup>     |

---

1: Complete chromosome or plasmid sequence

2: Draft genome scaffolds included in the ssGeneFinder Webserver

3: Draft genome contigs included in the ssGeneFinder Webserver
