# Supplementary material
Source: PubMed Central journal article supplement (PMC3372160)
Supplement: supp_50.6.1905_JCM-JCM06843-11-s02.pdf [file supp_50.6.1905_JCM-JCM06843-11-s02.pdf]

FIG. 1A

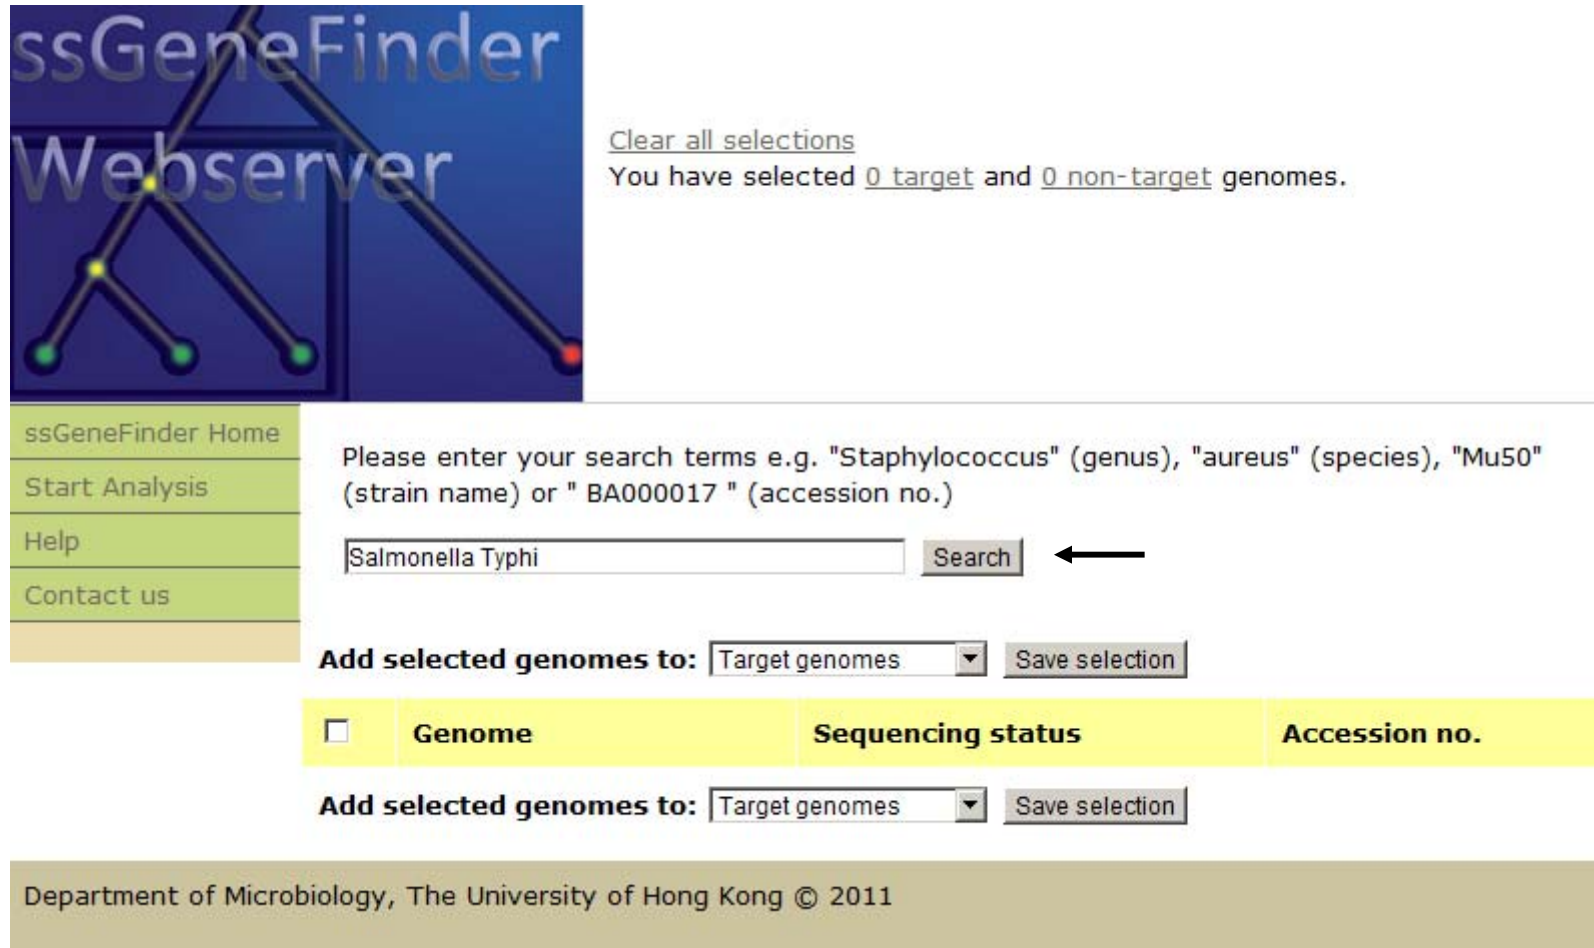

The image shows the ssGeneFinder Webserver interface. At the top left is a logo with a tree diagram and the text "ssGeneFinder Webserver". To the right of the logo, there is a link "Clear all selections" and a status message: "You have selected 0 target and 0 non-target genomes." Below the logo is a navigation menu with four items: "ssGeneFinder Home", "Start Analysis", "Help", and "Contact us". The main content area contains a search instruction: "Please enter your search terms e.g. 'Staphylococcus' (genus), 'aureus' (species), 'Mu50' (strain name) or 'BA000017' (accession no.)". Below this is a search input field containing "Salmonella Typhi" and a "Search" button, with an arrow pointing to the button. Underneath the search field is another "Add selected genomes to:" section with a dropdown menu set to "Target genomes" and a "Save selection" button. Below this is a table with three columns: "Genome", "Sequencing status", and "Accession no.". The table is currently empty. Below the table is another "Add selected genomes to:" section with a dropdown menu set to "Target genomes" and a "Save selection" button. At the bottom of the page is a footer: "Department of Microbiology, The University of Hong Kong © 2011".

ssGeneFinder  
Webserver

[Clear all selections](#)  
You have selected 0 target and 0 non-target genomes.

ssGeneFinder Home  
Start Analysis  
Help  
Contact us

Please enter your search terms e.g. "Staphylococcus" (genus), "aureus" (species), "Mu50" (strain name) or "BA000017" (accession no.)

Salmonella Typhi Search ←

Add selected genomes to: Target genomes Save selection

| <input type="checkbox"/> | Genome | Sequencing status | Accession no. |
|--------------------------|--------|-------------------|---------------|
|--------------------------|--------|-------------------|---------------|

Add selected genomes to: Target genomes Save selection

Department of Microbiology, The University of Hong Kong © 2011

FIG. 1B

Please enter your search terms e.g. "Staphylococcus aureus" (genus and species name), "Staphylococcus" (genus), "aureus" (species), "Mu50" (strain name) or " BA000017 " (accession no.)

 

Add selected genomes to:   ←

| <input type="checkbox"/>            | Genome                                                     | Sequencing status | Accession no.               |
|-------------------------------------|------------------------------------------------------------|-------------------|-----------------------------|
| <input checked="" type="checkbox"/> | <a href="#">Salmonella enterica serovar Typhi 404ty</a>    | draft             | CAAQ00000000 (from contigs) |
| <input checked="" type="checkbox"/> | <a href="#">Salmonella enterica serovar Typhi E00 7866</a> | draft             | CAAR00000000 (from contigs) |
| <input checked="" type="checkbox"/> | <a href="#">Salmonella enterica serovar Typhi E01 6750</a> | draft             | CAAS00000000 (from contigs) |
| <input checked="" type="checkbox"/> | <a href="#">Salmonella enterica serovar Typhi E02 1180</a> | draft             | CAAT00000000 (from contigs) |
| <input checked="" type="checkbox"/> | <a href="#">Salmonella enterica serovar Typhi E98 0664</a> | draft             | CAAU00000000 (from contigs) |
| <input checked="" type="checkbox"/> | <a href="#">Salmonella enterica serovar Typhi E98 2068</a> | draft             | CAAV00000000 (from contigs) |

FIG. 1C

Check to select all

Add selected genomes to: Non-target genomes Save selection ←

| <input checked="" type="checkbox"/> | Genome                     | Sequencing status | Accession no.                                                 |
|-------------------------------------|----------------------------|-------------------|---------------------------------------------------------------|
| <input checked="" type="checkbox"/> | Shigella D9                | draft             | NZ_ACDL000000000.scaffold                                     |
| <input checked="" type="checkbox"/> | Shigella dysenteriae 1012  | draft             | NZ_AAMJ000000000.contig                                       |
| <input checked="" type="checkbox"/> | Shigella dysenteriae 1617  | draft             | NZ_ADUT000000000.contig                                       |
| <input checked="" type="checkbox"/> | Shigella flexneri 2a 301   | complete          | NC_004337<br>NC_004851                                        |
| <input checked="" type="checkbox"/> | Shigella sonnei Ss046      | complete          | NC_007384<br>NC_007385<br>NC_009345<br>NC_009346<br>NC_009347 |
| <input checked="" type="checkbox"/> | Shigella flexneri 5 8401   | complete          | NC_008258                                                     |
| <input checked="" type="checkbox"/> | Shigella boydii Sb227      | complete          | NC_007608<br>NC_007613                                        |
| <input checked="" type="checkbox"/> | Shigella flexneri 2a 2457T | complete          | NC_004741                                                     |
| <input checked="" type="checkbox"/> | Shigella dysenteriae Sd197 | complete          | NC_007606<br>NC_007607<br>NC_009344                           |

FIG. 1D

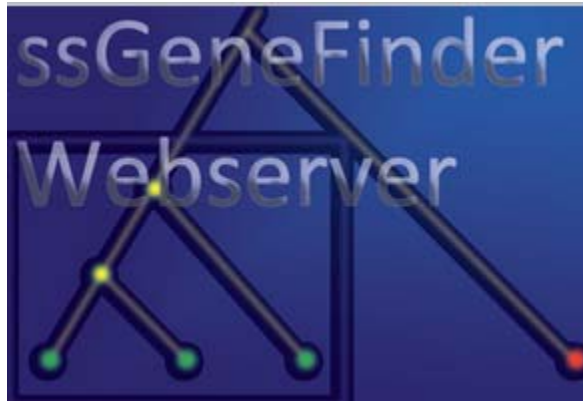

---

[Clear all selections](#)

You have selected 11 target and 375 non-target genomes.

If you have finalized your genome selection, **click [here](#) to proceed.**

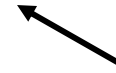

## FIG. 1E

Please specify the parameters for your ssGeneFinder run.

The default values have been tested using various genomes, although they may still be optimized to suit special target selection needs.

E-value for conserved target sequence(s)

E-value for elimination of non-target sequence(s)

Minimum target sequence length

Target must be present in at least

 % of target genomes

\* The maximum number of iterative elimination steps and multiple alignment options are fixed on this version.

Your email address

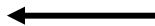

## FIG. 1F

Dear user,

A summary report of your analysis on ssGeneFinder Webserver has been attached with this email. If the results are not satisfactory, you may like to examine the attached log file (log.txt) and modify the settings.

The genome files, unique targets and target alignments have been stored on our server for your retrieval at any time. Just check the URL below -

<http://147.8.74.24/tom/ssGeneFinder%20Webserver/browse.php?id=a356b19654f5ea3b7f3f7c9a3144e92e>

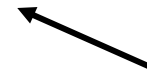

FIG. 1G

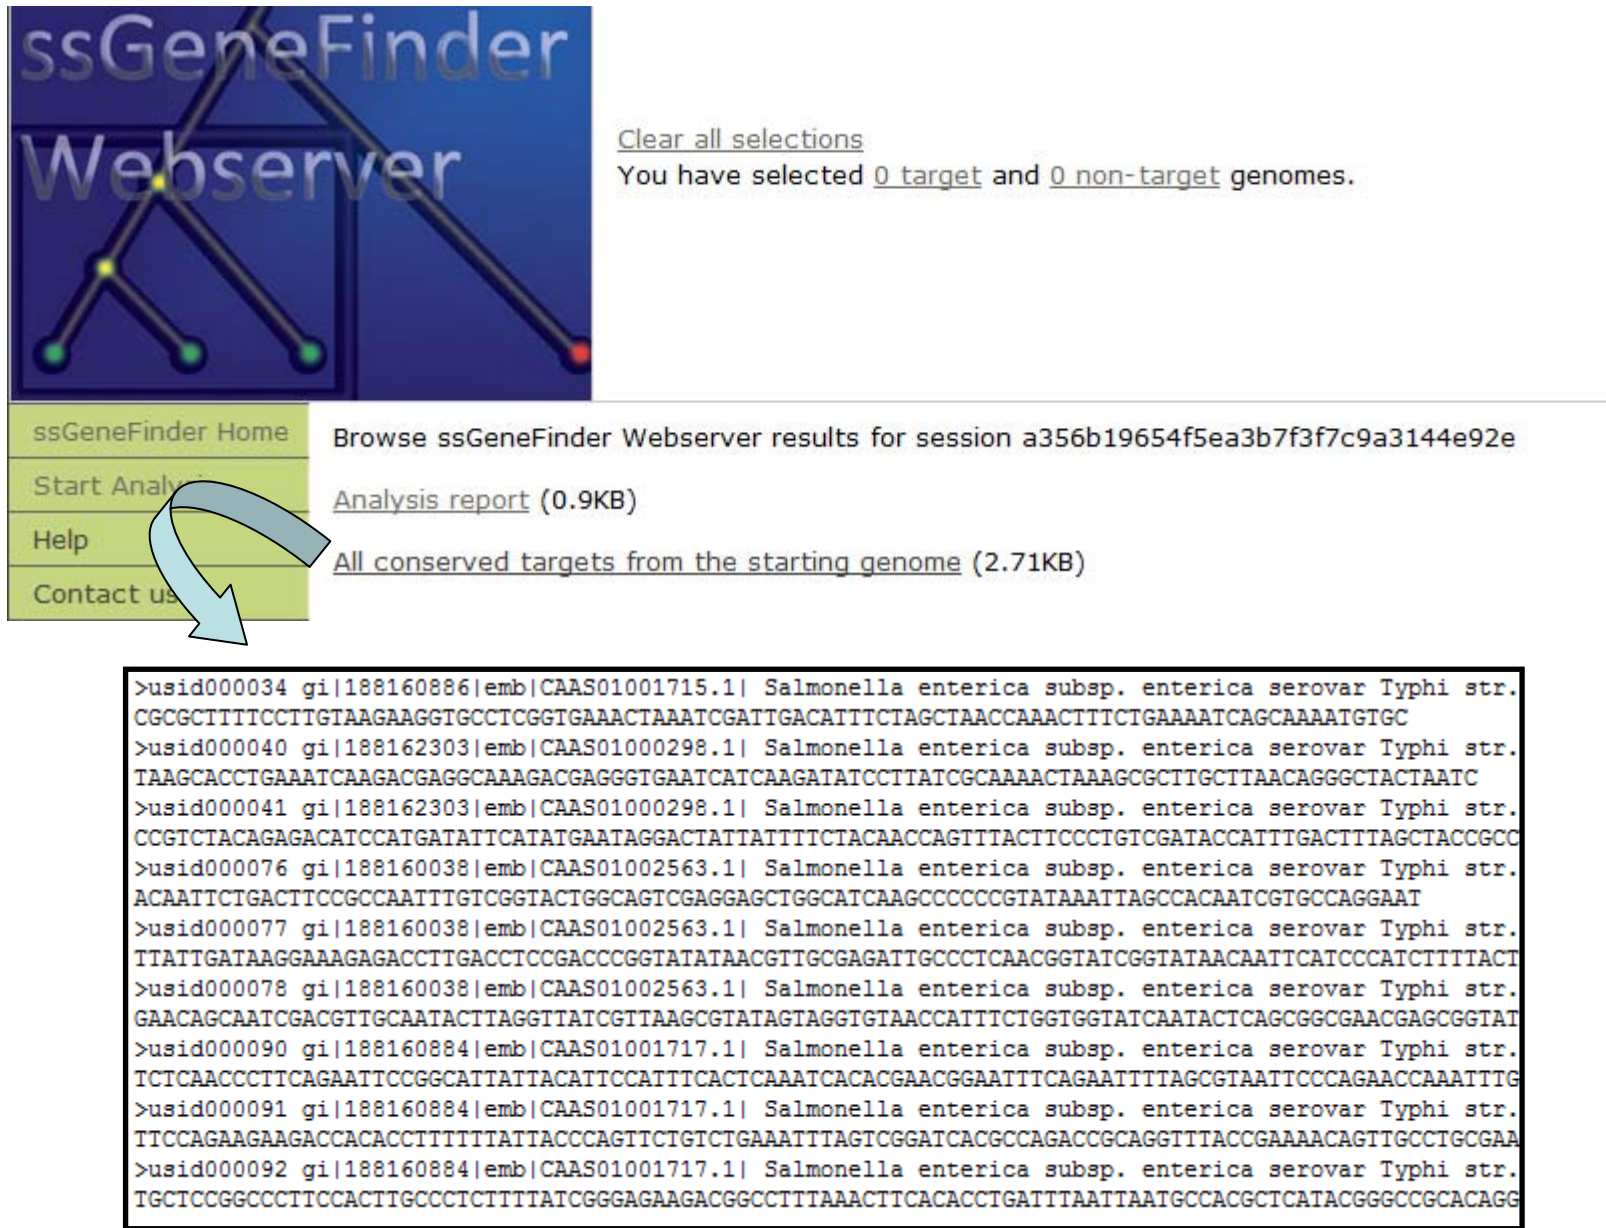

ssGeneFinder  
Webserver

[Clear all selections](#)  
You have selected 0 target and 0 non-target genomes.

|                   |                                                                                    |
|-------------------|------------------------------------------------------------------------------------|
| ssGeneFinder Home | Browse ssGeneFinder Webserver results for session a356b19654f5ea3b7f3f7c9a3144e92e |
| Start Analysis    | <a href="#">Analysis report (0.9KB)</a>                                            |
| Help              | <a href="#">All conserved targets from the starting genome (2.71KB)</a>            |
| Contact us        |                                                                                    |

```
>usid000034 gi|188160886|emb|CAAS01001715.1| Salmonella enterica subsp. enterica serovar Typhi str.
CGCGCTTTTCCTTGTAAGAAGGTGCCTCGGTGAAACTAAATCGATTGACATTCTAGCTAACCAAACCTTTCTGAAAATCAGCAAAATGTGC
>usid000040 gi|188162303|emb|CAAS01000298.1| Salmonella enterica subsp. enterica serovar Typhi str.
TAAGCACCTGAAATCAAGACGAGGCAAAGACGAGGGTGAATCATCAAGATATCCTTATCGCAAACTAAAGCGCTTGCTTAACAGGGCTACTAATC
>usid000041 gi|188162303|emb|CAAS01000298.1| Salmonella enterica subsp. enterica serovar Typhi str.
CCGTCTACAGAGACATCCATGATATTCATATGAATAGGACTATTATTTCTACAACCAGTTTACTTCCCTGTCGATAACCATTGACTTTAGCTACCGCC
>usid000076 gi|188160038|emb|CAAS01002563.1| Salmonella enterica subsp. enterica serovar Typhi str.
ACAATTCTGACTTCCGCCAATTTGTCGGTACTGGCAGTCGAGGAGCTGGCATCAAGCCCCCGTATAAATTAGCCACAATCGTGCCAGGAAT
>usid000077 gi|188160038|emb|CAAS01002563.1| Salmonella enterica subsp. enterica serovar Typhi str.
TTATTGATAAGGAAAGAGACCTTGACCTCCGACCCGGTATATAACGTTGCGAGATTGCCTCAACGGTATCGGTATAACAATTCATCCCATCTTTTACT
>usid000078 gi|188160038|emb|CAAS01002563.1| Salmonella enterica subsp. enterica serovar Typhi str.
GAACAGCAATCGACGTTGCAATACTTAGGTTATCGTTAAGCGTATAGTAGGTGTAACCAATTTCTGGTGGTATCAATACTCAGCGGCGAACGAGCGGTAT
>usid000090 gi|188160884|emb|CAAS01001717.1| Salmonella enterica subsp. enterica serovar Typhi str.
TCTCAACCCTTCAGAATTCGGGCATTATTACATTCATTTCACTCAAATCACACGAACGGAATTTCAGAATTTTAGCGTAATCCCAGAACCAATTTG
>usid000091 gi|188160884|emb|CAAS01001717.1| Salmonella enterica subsp. enterica serovar Typhi str.
TTCCAGAAGAAGACCACACCTTTTTTATTACCCAGTCTGTCTGAAATTTAGTCGGATCAGCCAGACCGCAGGTTTACCGAAAACAGTTGCCTGCGAA
>usid000092 gi|188160884|emb|CAAS01001717.1| Salmonella enterica subsp. enterica serovar Typhi str.
TGCTCCGGCCCTTCCACTTGCCCTCTTTTATCGGGAGAAGACGGCCTTTAACTTCACACCTGATTTAATTAATGCCAGCTCATACGGGCCGCACAGG
```
